# Supplementary material for: Induced affective states do not modulate effort avoidance
Source: Springer Nature journal article supplement (doi:10.1007/s00426-020-01300-9), 2020-02-08
Supplement: MOESM1 [file 17662708]

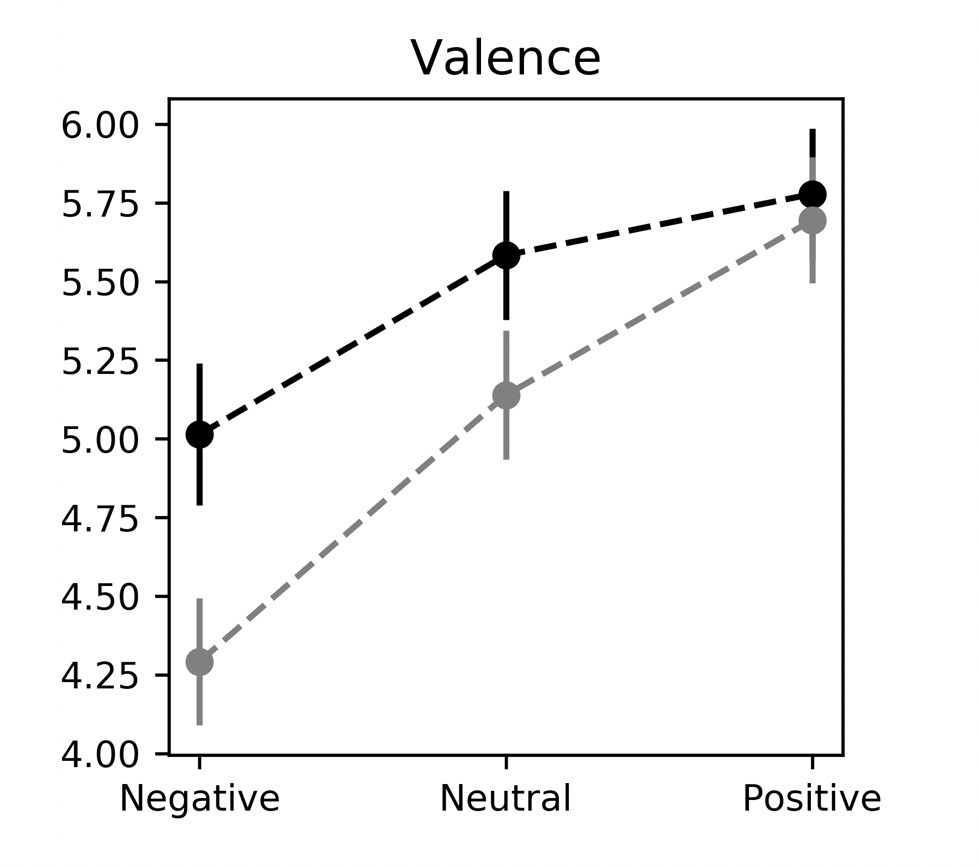


Supplementary Figure 1. Valence scores in Experiment 1 (black) and Experiment 2 (gray). Error bars denote between-participants s.e.m.


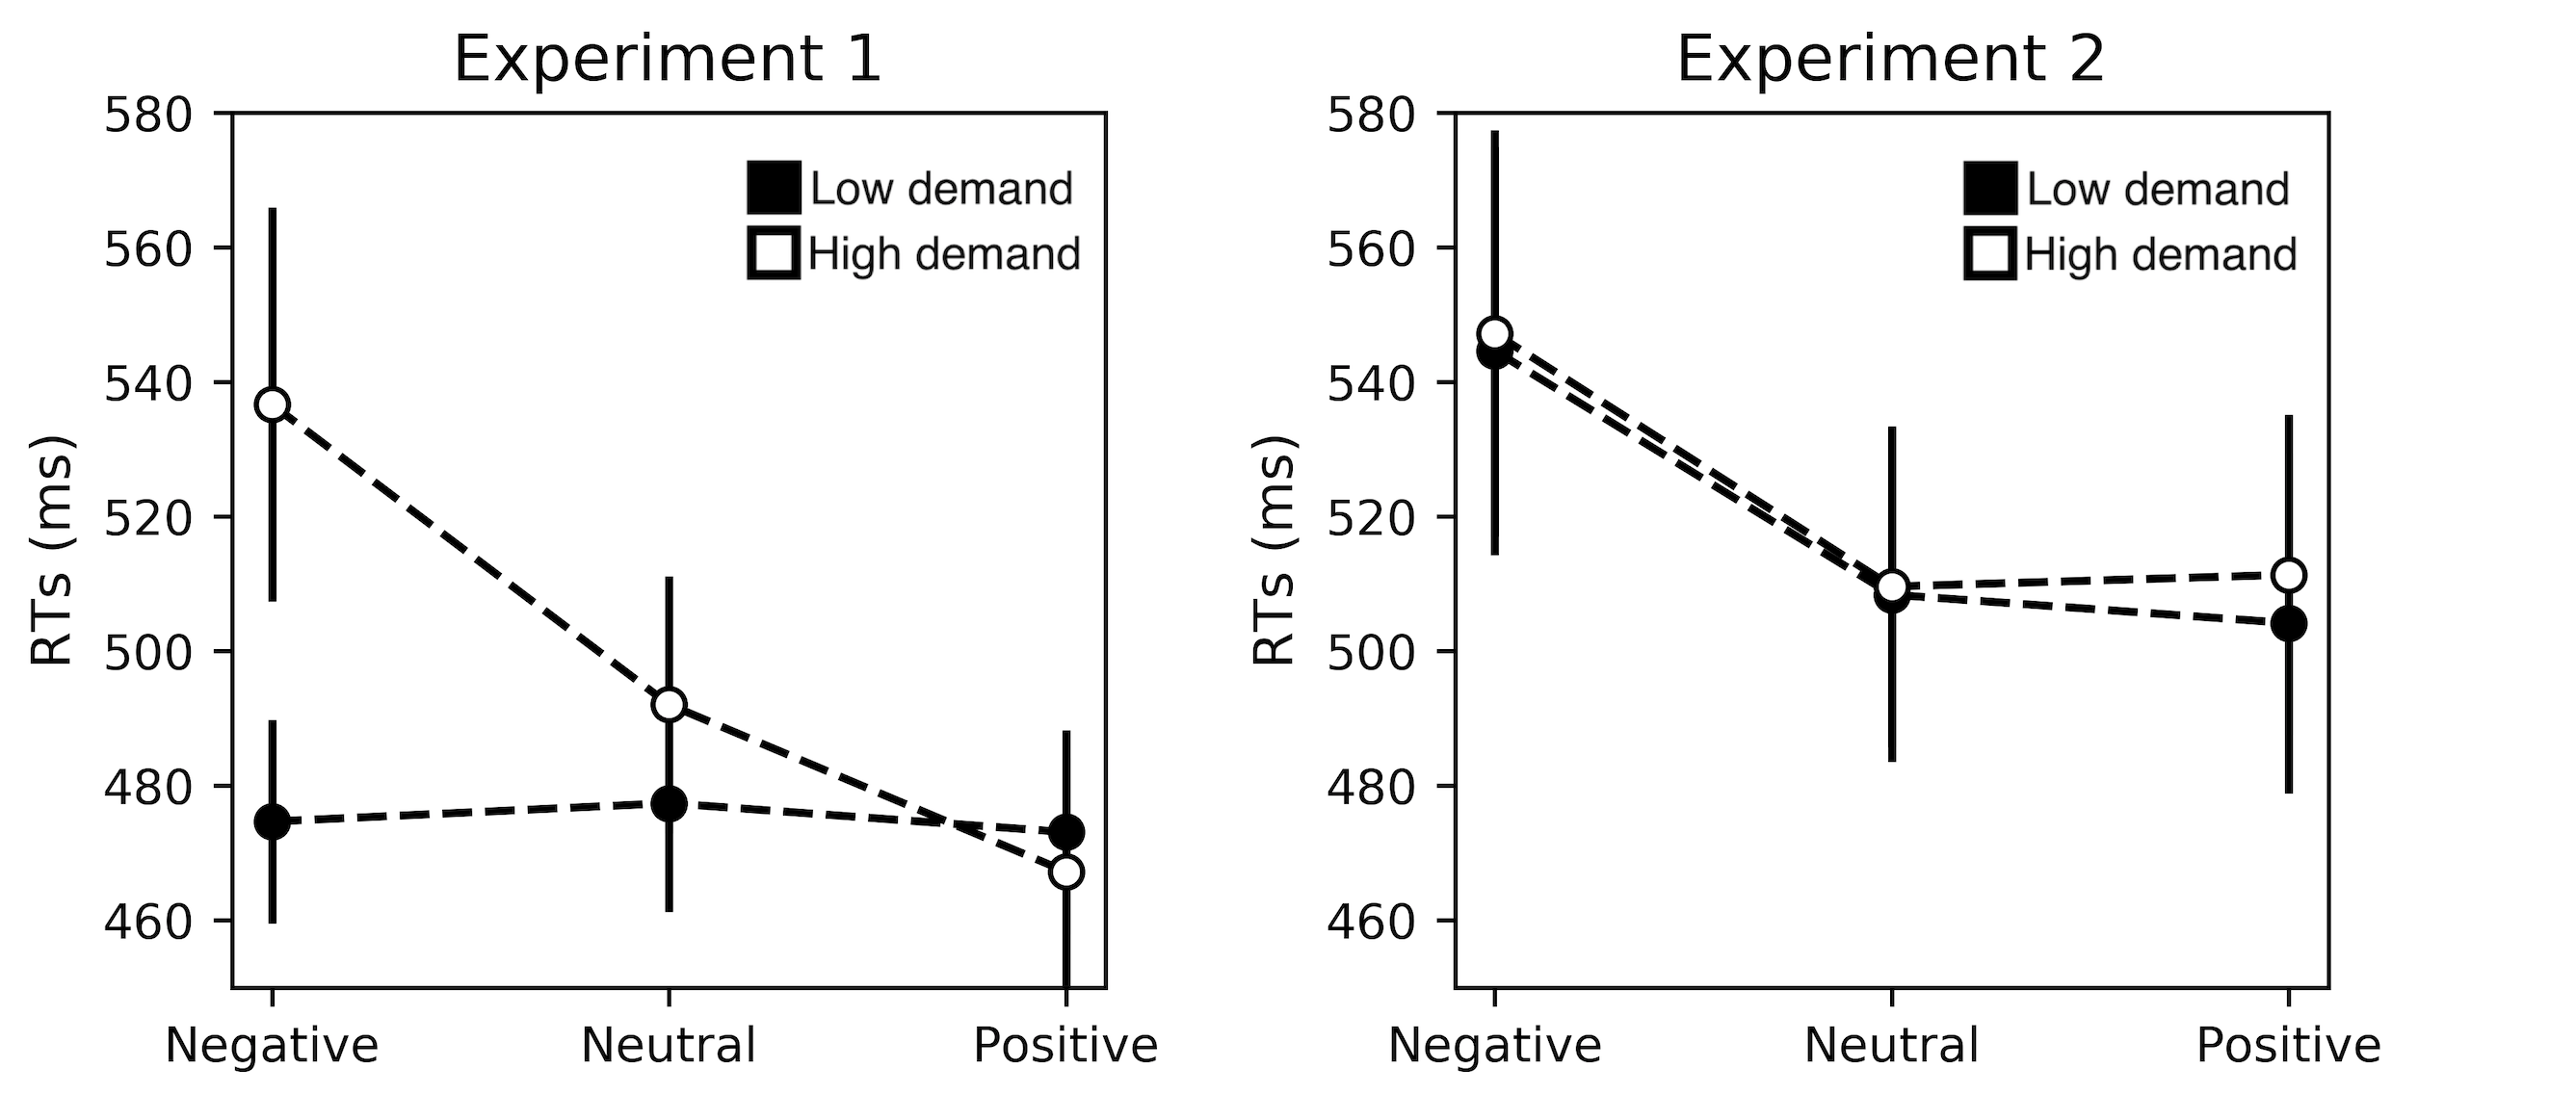


Supplementary Figure 2. Decision reaction times in Experiment 1 (left) and Experiment 2 (right). Error bars denote between-participants s.e.m.


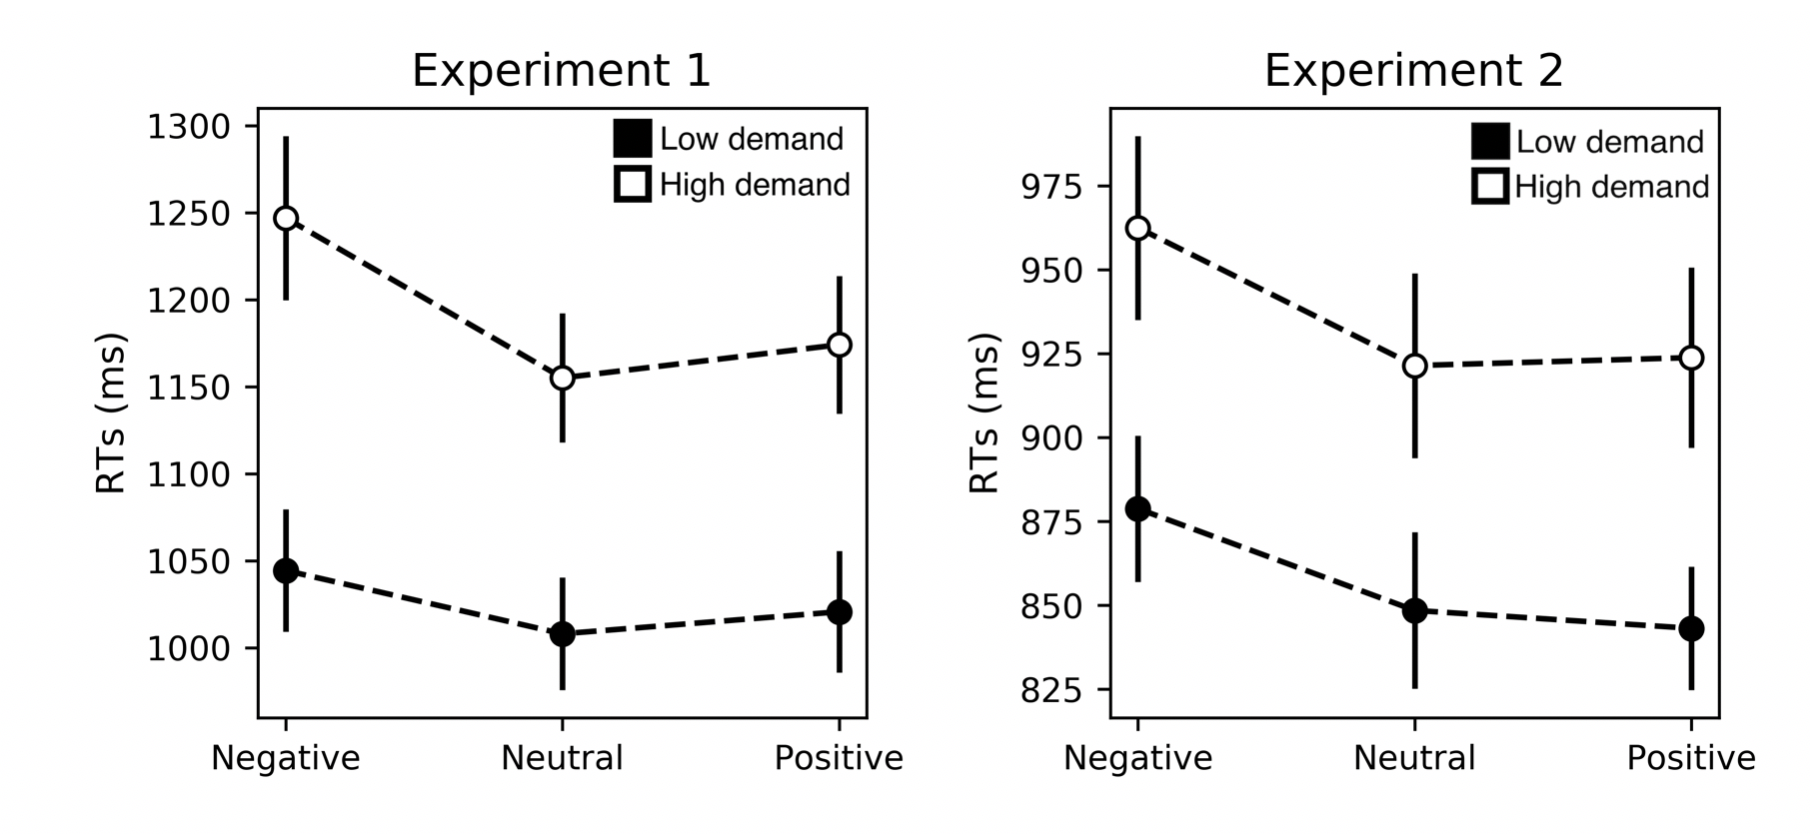


Supplementary Figure 3. Task reaction times in Experiment 1 (left) and Experiment 2 (right). Error bars denote between-participants s.e.m.

| Supplementary Table 1. Mean (M) and Standard Deviation (SD) for task repetition and switch trials of Experiment 1 | | | | | | | |
| --- | --- | --- | --- | --- | --- | --- | --- |
|  | | Task repetition | | | Task switch | |
| Measure | *M* | | *SD* | *M* | | *SD* |
| Low-demand selection (%) | 83 | | 37 | 20 | | 43 |
| Decision RTs (ms) | 448 | | 499 | 466 | | 1051 |
| Task RTs (ms) | 967 | | 1076 | 1183 | | 1112 |
| Task accuracy (%) | 96 | | 18 | 94 | | 23 |

| Supplementary Table 2. Mean (M) and Standard Deviation (SD) for task repetition and switch trials of Experiment 2 | | | | | | | |
| --- | --- | --- | --- | --- | --- | --- | --- |
|  | | Task repetition | | | Task switch | |
| Measure | *M* | | *SD* | *M* | | *SD* |
| Low-demand selection (%) | 75 | | 43 | 31 | | 46 |
| Decision RTs (ms) | 515 | | 425 | 519 | | 386 |
| Task RTs (ms) | 821 | | 258 | 953 | | 555 |
| Task accuracy (%) | 94 | | 23 | 91 | | 28 |
